# Supplementary material for: Characterization of tumor endothelial cells (TEC) in gastric cancer and development of a TEC-based risk signature using single-cell RNA-seq and bulk RNA-seq data
Source: publisher site journal article supplement (doi:10.18632/aging.205928), 2024-06-12
Supplement: Supplementary file [file aging-v16-205928-supplementary-material-SD1.pdf]

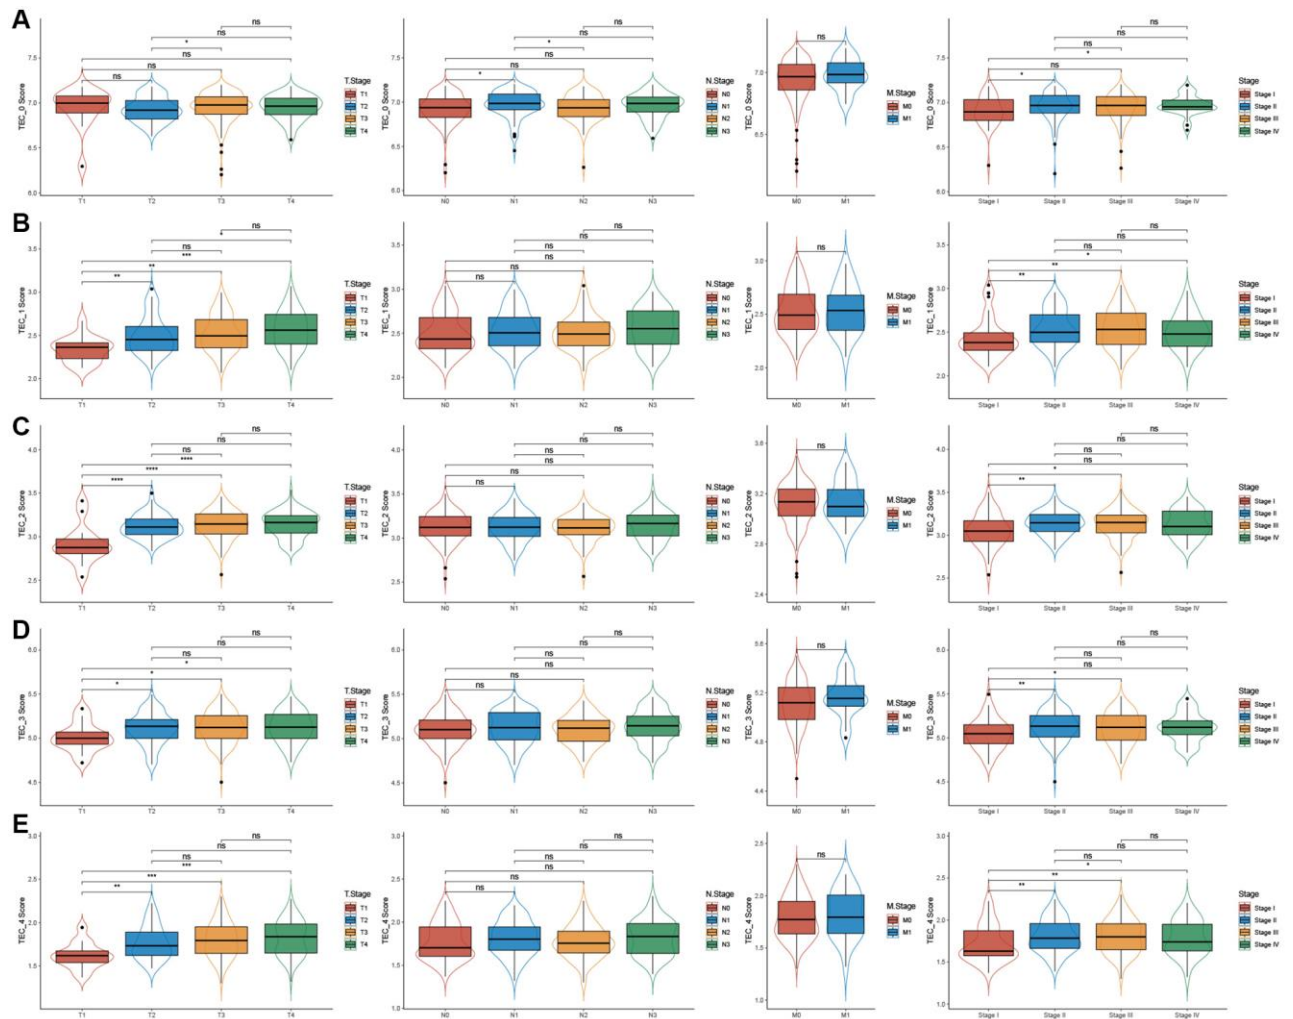

**Supplementary Figure 2.** The differences between TEC scores and clinical variables in five TEC clusters (A–E).
